# MIND TO MIND

*Creative writing that explores the abstract side  
of our profession and our lives*

*Carol Wiley Cassella, M.D., Editor*

## One-night Stands ...

James M. Berry, M.D.

The House of God defines anesthesia  
As a “non-patient contact” specialty, and  
I am often asked, “Do you miss the relationships?”  
The frail woman with pictures of her new grandbaby  
And the box of cookies in hypertension clinic  
every Christmas.  
I think of my relationship with the nice man  
With the aorto-duodenal fistula, who I came  
to know well (both inside and out) one bloody night  
and how he came back later just to shake my hand ...

---

From the Vanderbilt University School of Medicine, Nashville, Tennessee. james.berry@vanderbilt.edu

Accepted for publication June 2, 2014.

Copyright © 2014, the American Society of Anesthesiologists, Inc. Lippincott Williams & Wilkins. Anesthesiology 2014; 121:900-1

And the tracheal papillomatosis patient, who  
after 28 visits, had created his own anesthetic plan, and  
Walked out after 10 minutes in PACU saying  
“See you next time!”  
And, every day how I meet new friends and  
travel with them through dark valleys, and  
they are not afraid ...  
So, I think back and smile and reply  
“No, I don’t miss them at all ...”
